# Supplementary material for: Emerging Trends of Multidrug-Resistant (MDR) and Extensively Drug-Resistant (XDR) Salmonella Typhi in a Tertiary Care Hospital of Lahore, Pakistan
Source: MDPI journal article supplement (doi:10.3390/microorganisms9122484), 2021-11-30
Supplement: s1 [file s1]

# Supplementary Materials

Supplementary figures:

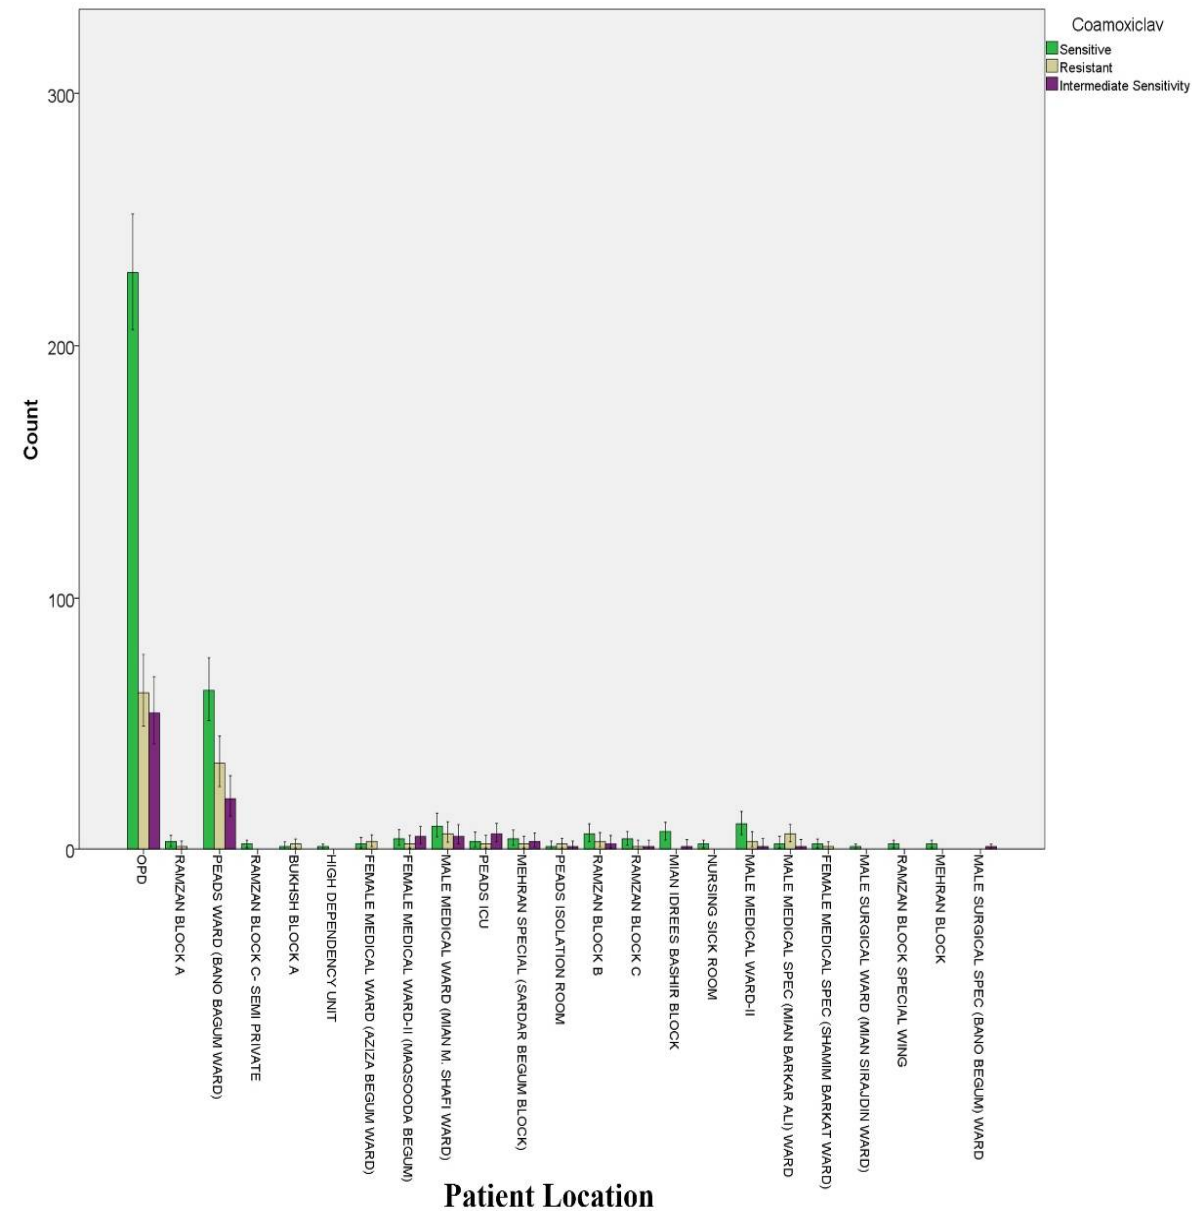

**Figure S1.** Occurrence of the resistant *Salmonella* strains against co-amoxiclav in different wards of the hospital.

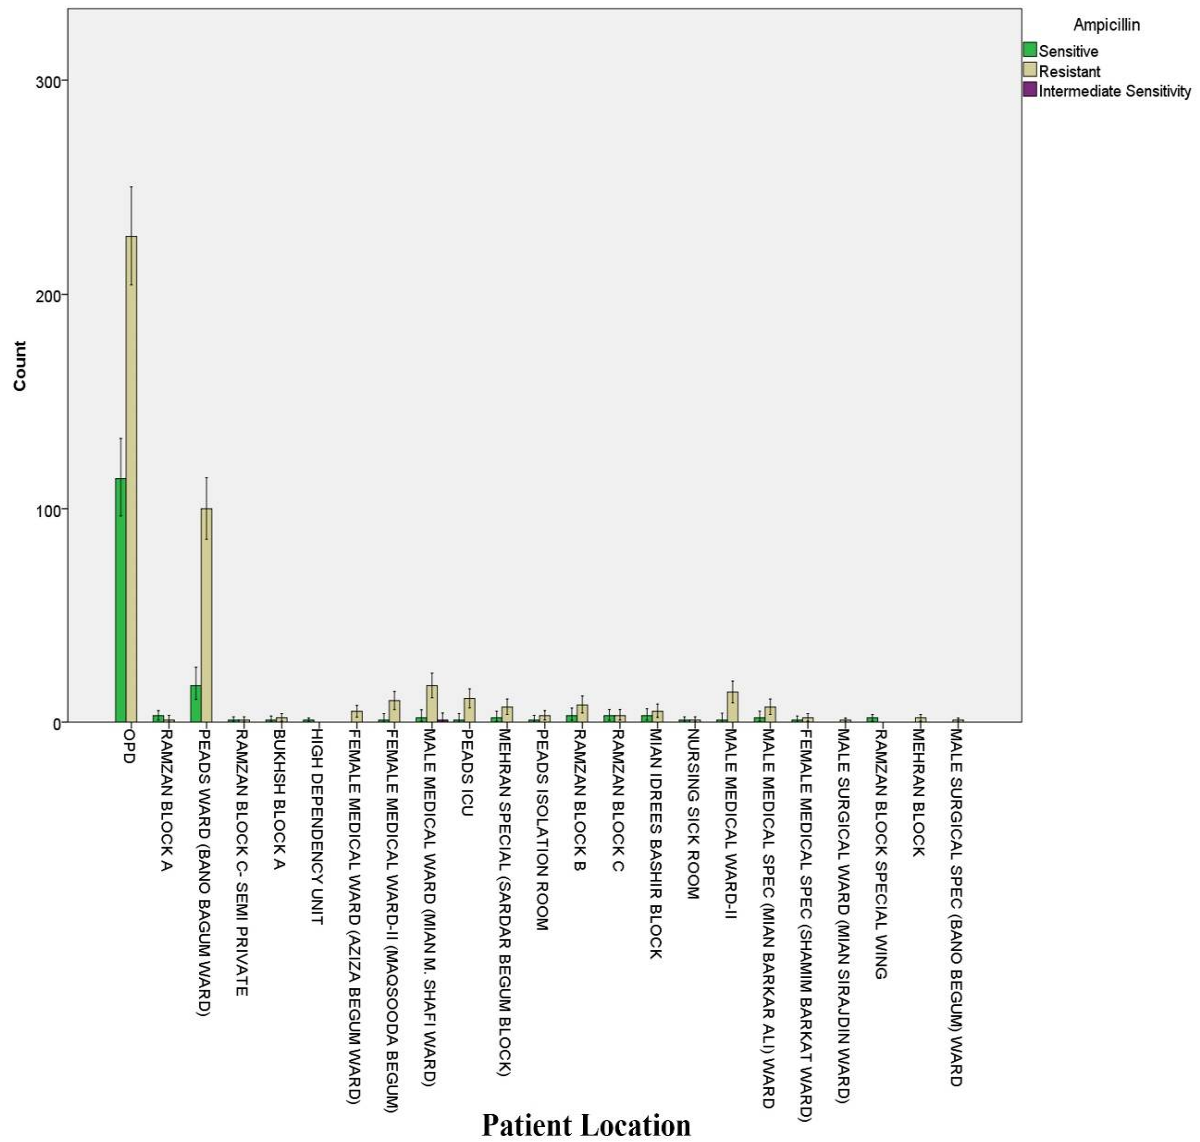

**Figure S2.** Occurrence of the resistant *Salmonella* strains against ampicillin in different wards of the hospital.

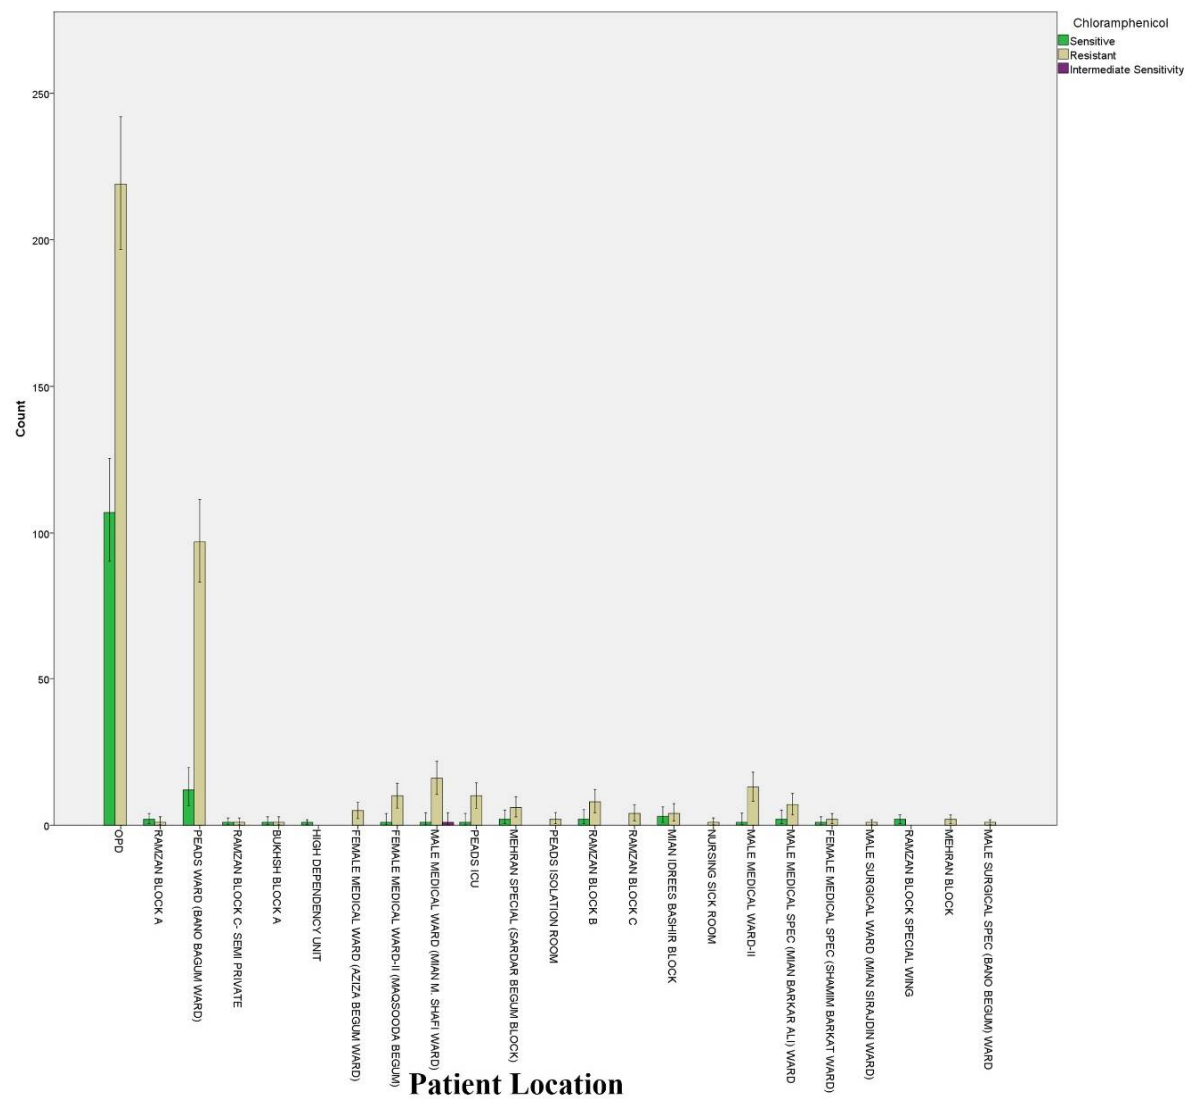

**Figure S3.** Occurrence of the resistant *Salmonella* strains against chloramphenicol in different wards of the hospital.

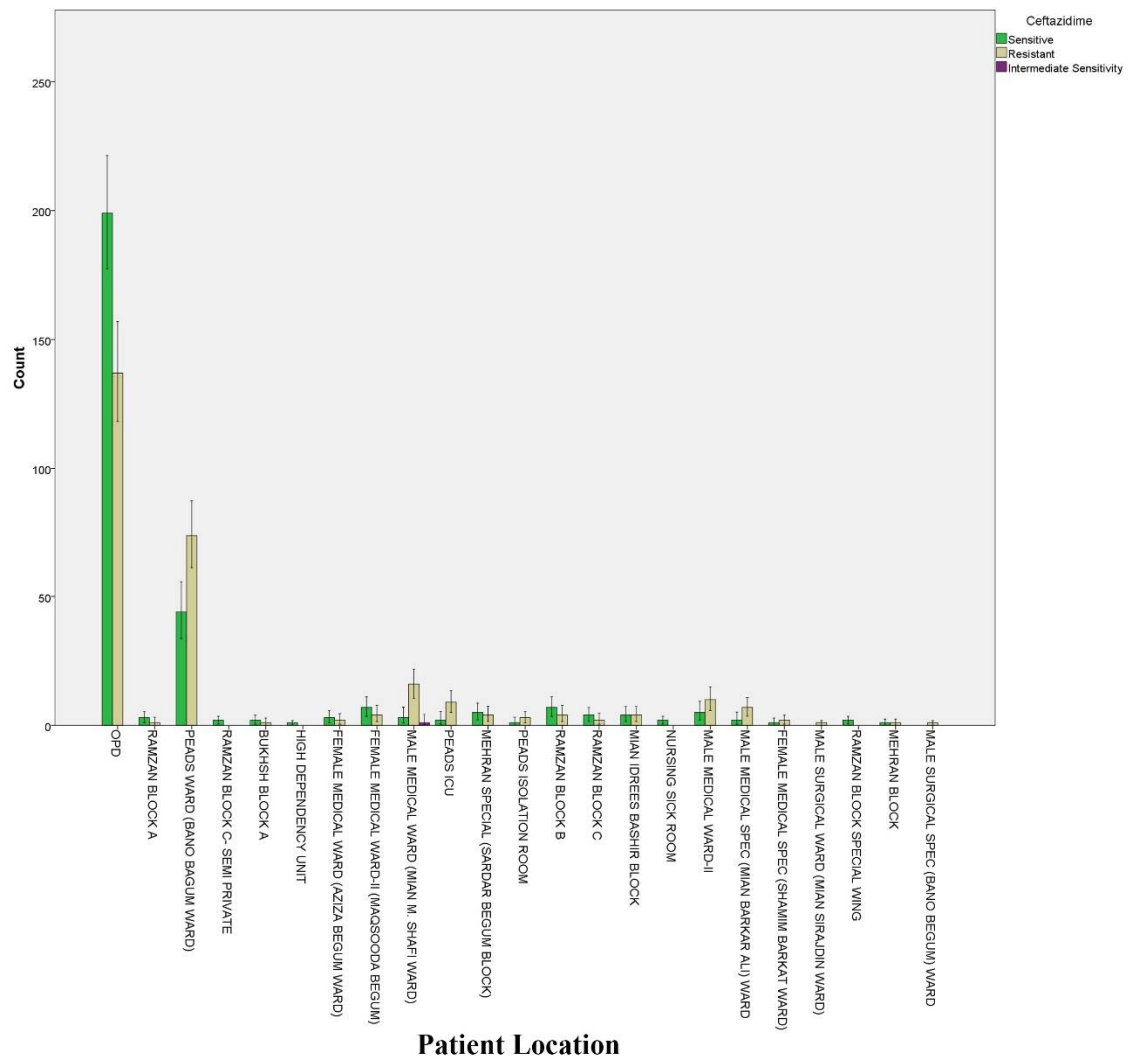

**Figure S4.** Occurrence of the resistant *Salmonella* strains against ceftazidime in different wards of the hospital

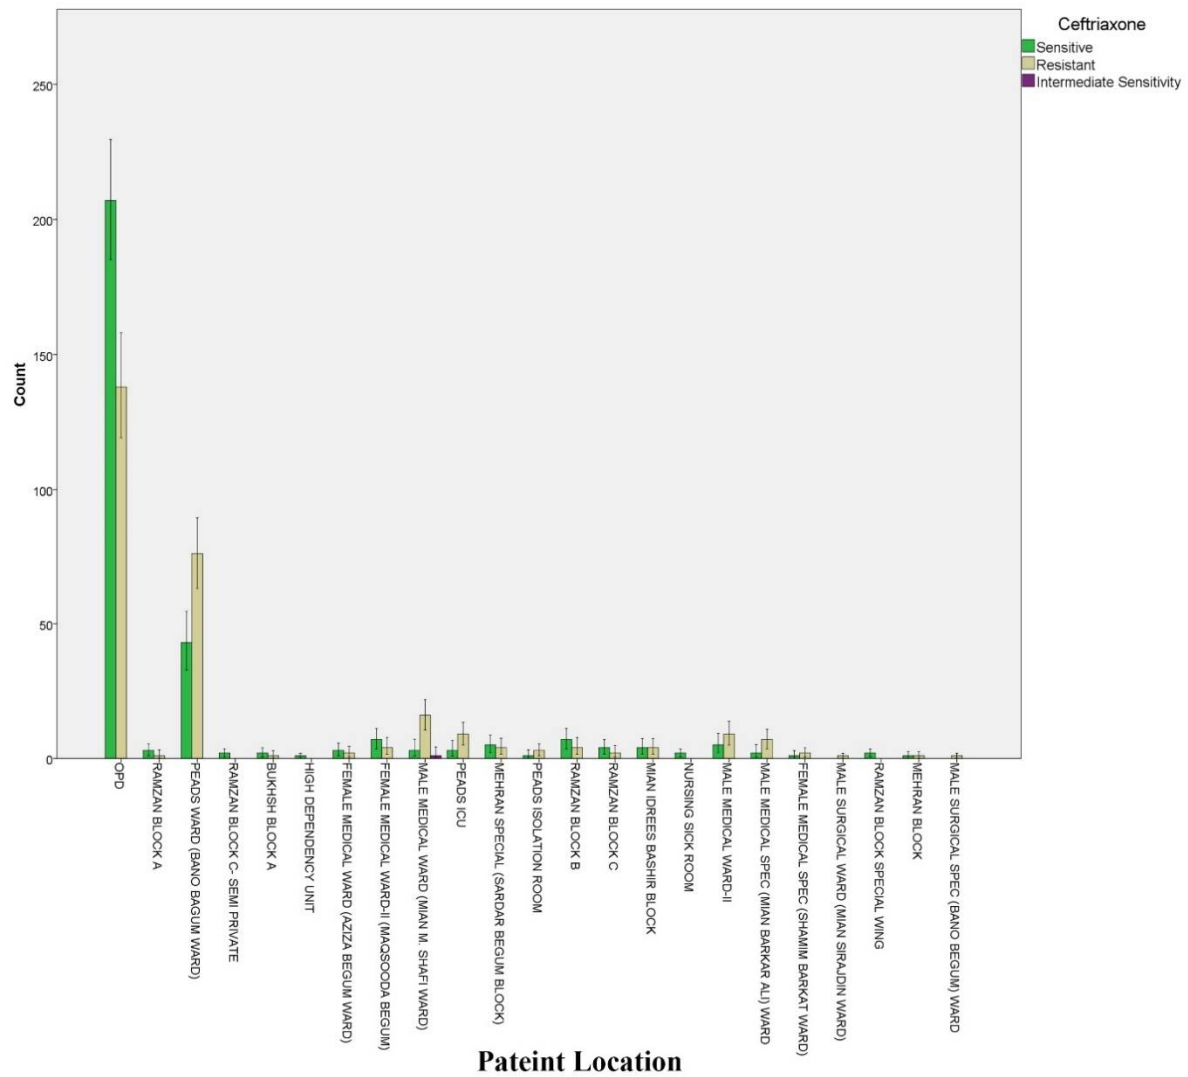

**Figure S5.** Occurrence of the resistant *Salmonella* strains against ceftriaxone in different wards of the hospital.

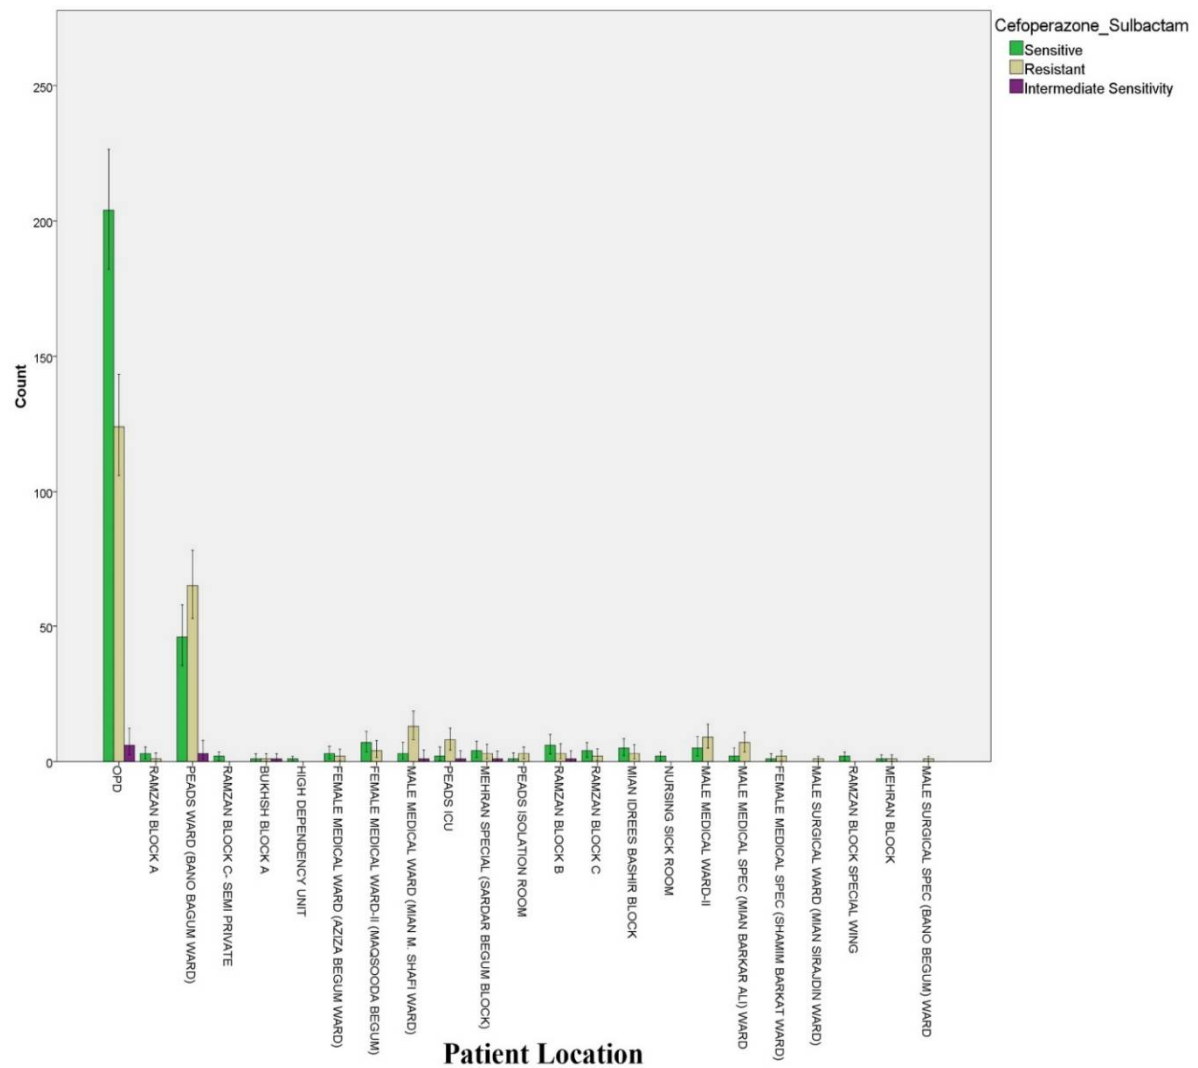

**Figure S6.** Occurrence of the resistant *Salmonella* strains against cefoperazone/sulbactam in different wards of the hospital.

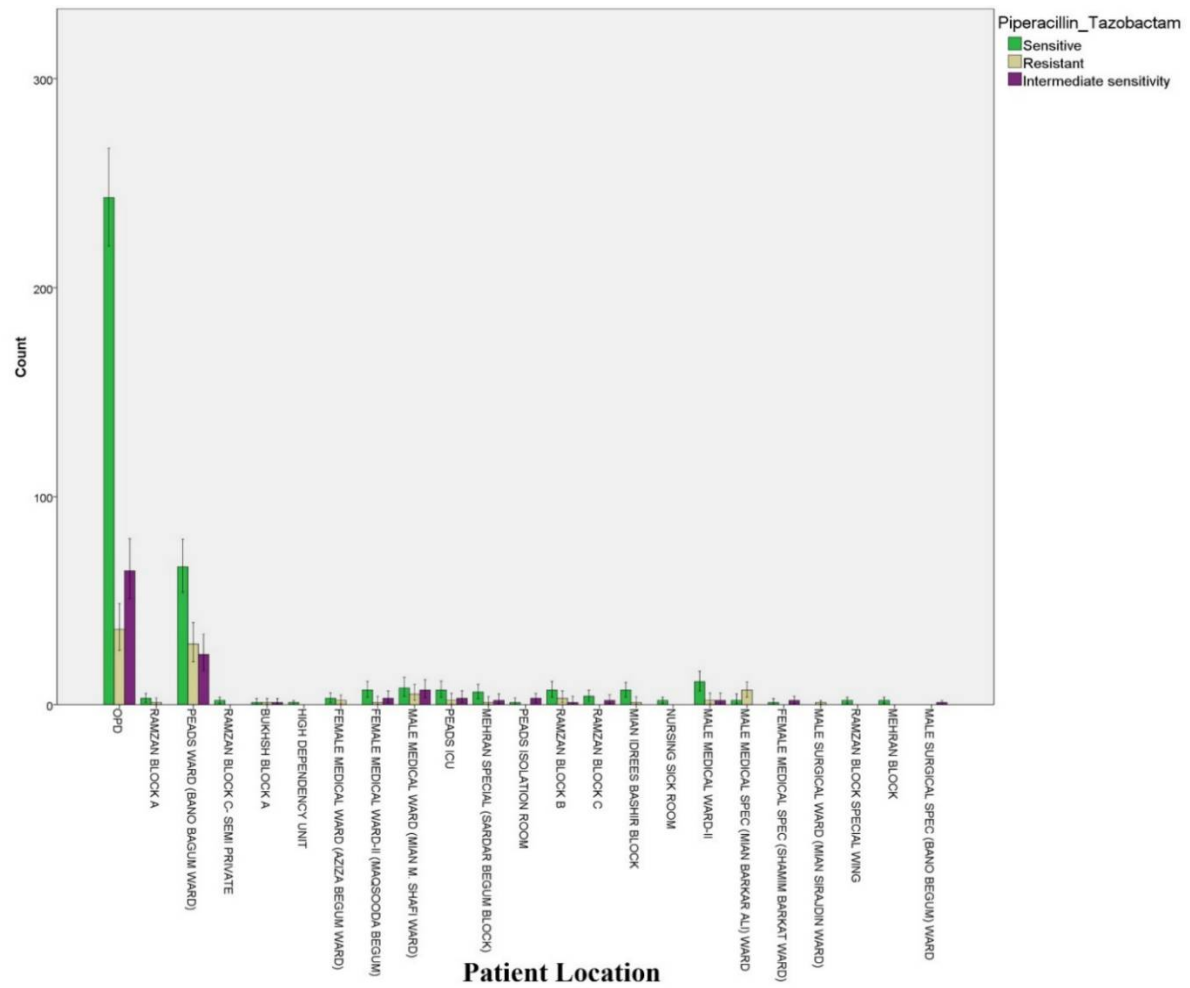

**Figure S7.** Occurrence of the resistant *Salmonella* strains against piperacillin/tazobactam in different wards of the hospital.
